# Supplementary material
Source: publisher figshare collection journal article supplement (https://tandf.figshare.com/ndownloader/files/15268235)
Supplement: Supplementary file 1 [file 15268235]

**Table S.1.** Chemical structure of acetogenin molecules present in a food-grade avocado seed extract (Avosafe®).

**Table S.1.** Estructura química de las acetogeninas presentes en un extracto grado alimenticio de semilla de aguacate (Avosafe®).

| **Compound** | **Molecular**  **formula** | **Structure** | **[M+H]+**  **/Ions (m/z)1** | **Reference** | | |
| --- | --- | --- | --- | --- | --- | --- |
| AcO-avocadenyne(**1**)2 | C19H32O4 | 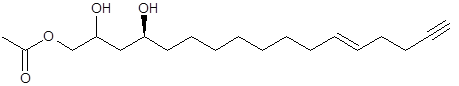 | 325  /347, 307, 265 | | [18,22] |
| AcO-avocadene  (**2**) | C19H36O4 | 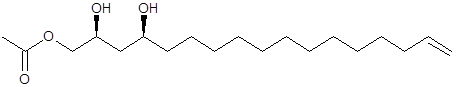 | 329  /351,311, 269, 251 | | [7] |
| UPA3  (**3**) | C19H34O4 | 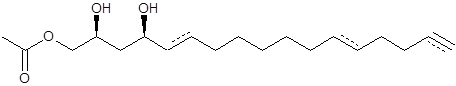 | 327  /349, 309, 267, 249 | | [18,22] |
| Persediene  (**4**) | C21H36O4 | 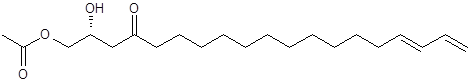 | 353  /375,335, 293 | | [15] |
| Persenone-C  (**5**) | C21H36O4 | 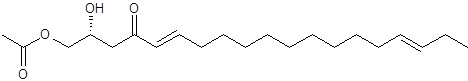 | 353  /375, 335, 293 | | [15] |
| Persenone-A (**6**) | C23H38O4 | 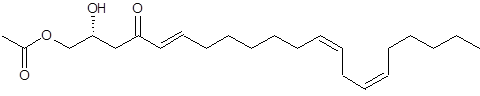 | 379  /401, 361, 319, 301 | | [7] |
| Persin  (**7**) | C23H40O4 | 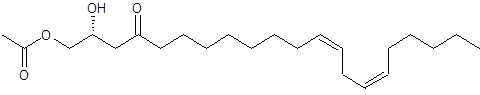 | 381  /403, 363, 321, 303 | | [57] |
| Persenone-B  (**8**) | C21H38O4 | 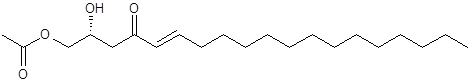 | 355  /377, 337, 295 | | [58] |

1MS/TOF detection using electrospray ionization interface in positive-ion mode of analysis. 2Number in parenthesis for each acetogenin refers to their elution order from HPLC column. 3UPA: Unknown putative acetogenin, which structure based on its fragmentation pattern might correspond to three reported acetogenins by Ramos-Jerz (2007) that differ in the position of the dotted unsaturated bonds (Rodríguez-López et al., 2015).

1Detección por MS/TOF empelado una interfase de ionización por electronebulización en modo de análisis de iones positivos.

2El número entre paréntesis para cada acetogenina se refiere a su orden de elución de la columna de HPLC.

3UPA: acetogenina putativa desconocida cuya estructura, con base en su patrón de fragmentación, podría corresponder a alguna de las tres acetogeninas reportadas por Ramos-Jerz (2007), las cuales difieren en la posición de las dobles insaturaciones punteadas (Rodríguez-López et al., 2015).
